# Supplementary material for: Purification and Characterization of Gum-Derived Polysaccharides of Moringa oleifera and Azadirachta indica and Their Applications as Plant Stimulants and Bio-Pesticidal Agents
Source: MDPI journal article supplement (doi:10.3390/molecules27123720), 2022-06-09
Supplement: s1 [file s1]

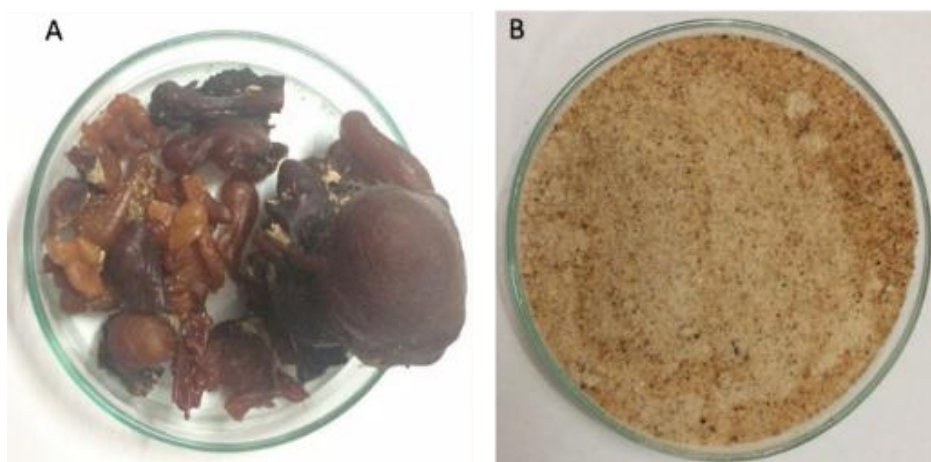

**Figure S1.** *Moringa oleifera* gum (MO), a) Dried crude gum, b) Powdered gum.

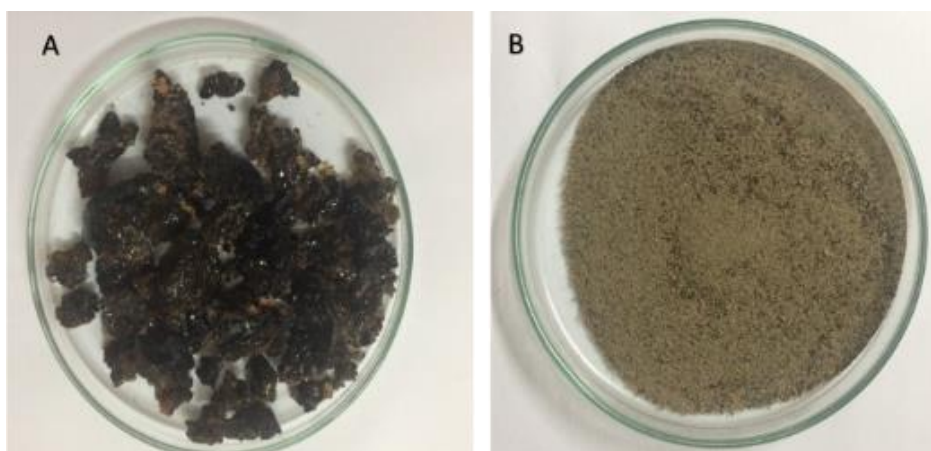

**Figure S2.** *Azadirachta indica* gum (AI), a) Dried crude gum, b) Powdered gum.

| Test           | MO | AI |
|----------------|----|----|
| Alkaloids      | ++ | +  |
| Flavonoids     | -  | ++ |
| Saponins       | +  | +  |
| Reducing Sugar | +  | +  |
| Amino acids    | -  | -  |

|              |   |   |
|--------------|---|---|
| Phytosterols | + | - |
| Tannins      | + | + |
| Glycosides   | + | + |

**Table S1.** Phytochemical analysis of gum.

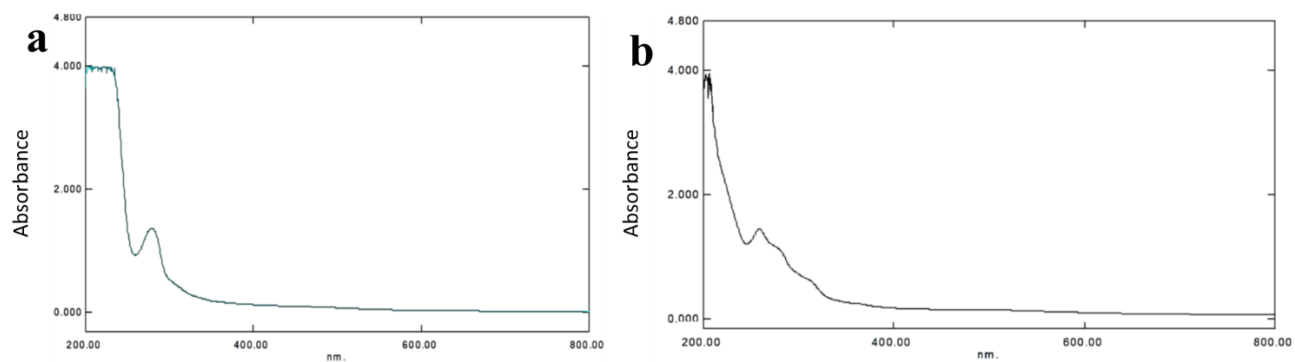

**Figure S3.** UV-Vis analysis a) MO gum, b) AI gum.

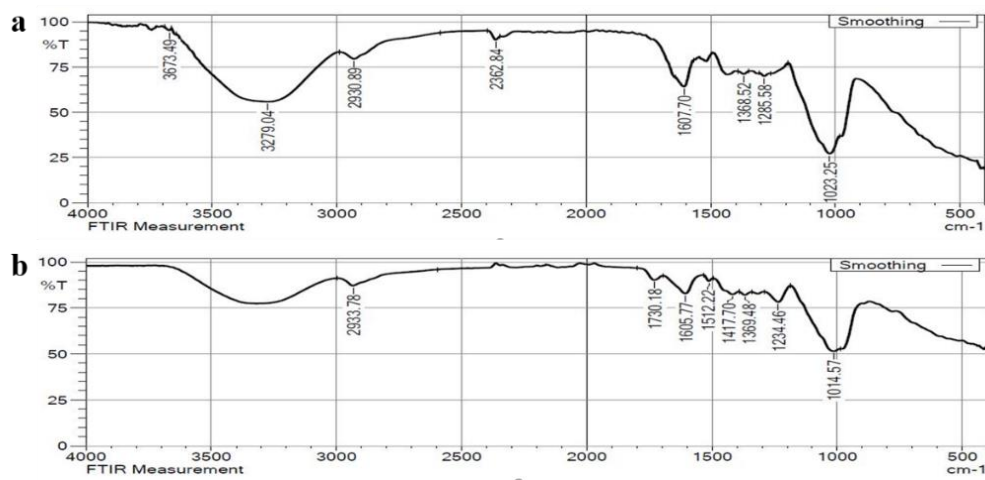

**Figure S4.** FTIR spectrum a) MO gum, b) AI gum.

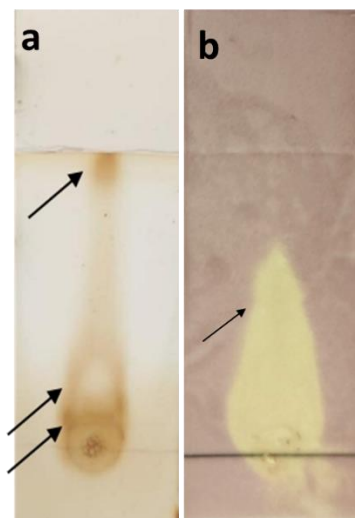

**Figure S5.** TLC of gum polysaccharide of MO gum a) exposed to Iodine, b) DPPH sprayed.

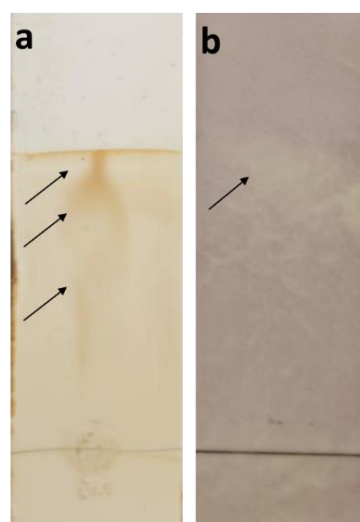

**Figure S6.** TLC of gum polysaccharide AI gum a) exposed to Iodine, b) DPPH sprayed.

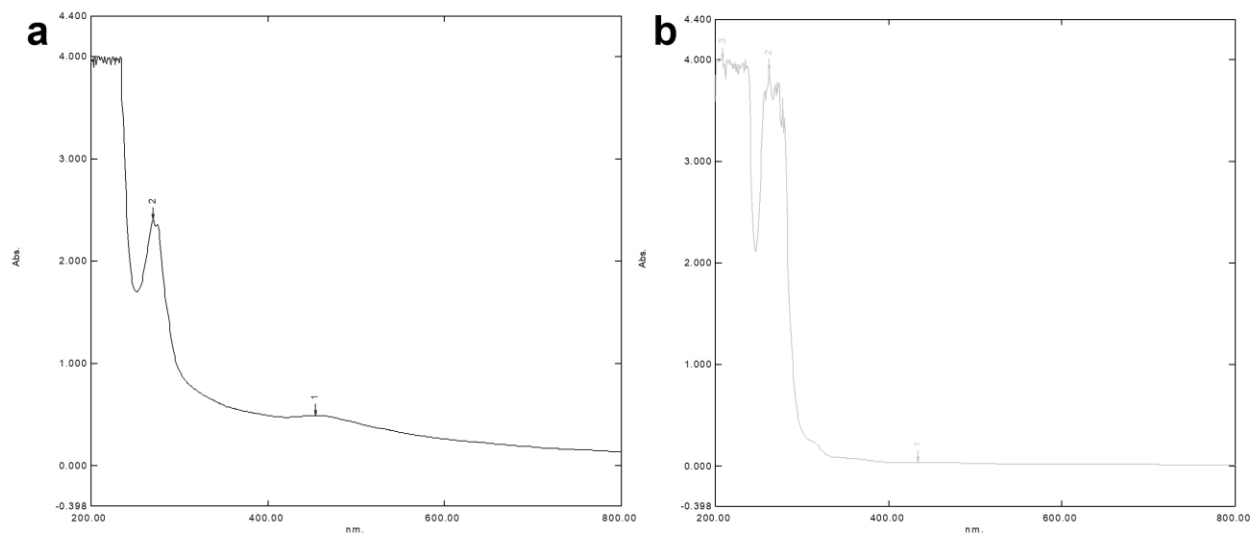

**Figure S7.** Phenol Sulfuric assay a) MO gum, b) AI gum.

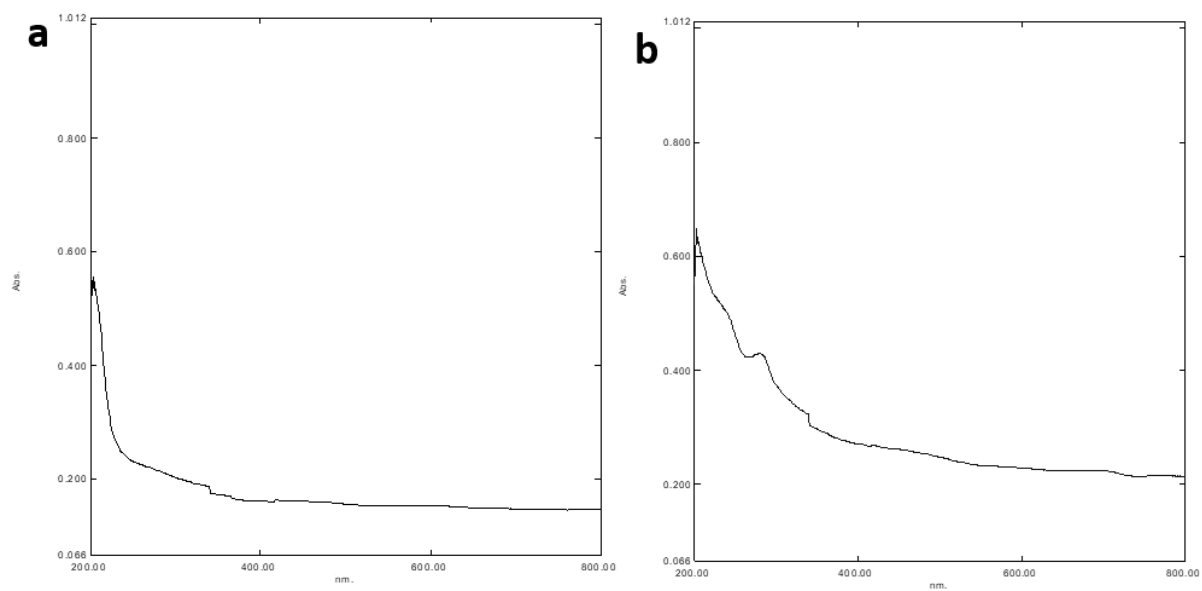

**Figure S8.** UV-Vis analysis purified gum polysaccharide a) MO gum, b) AI gum.

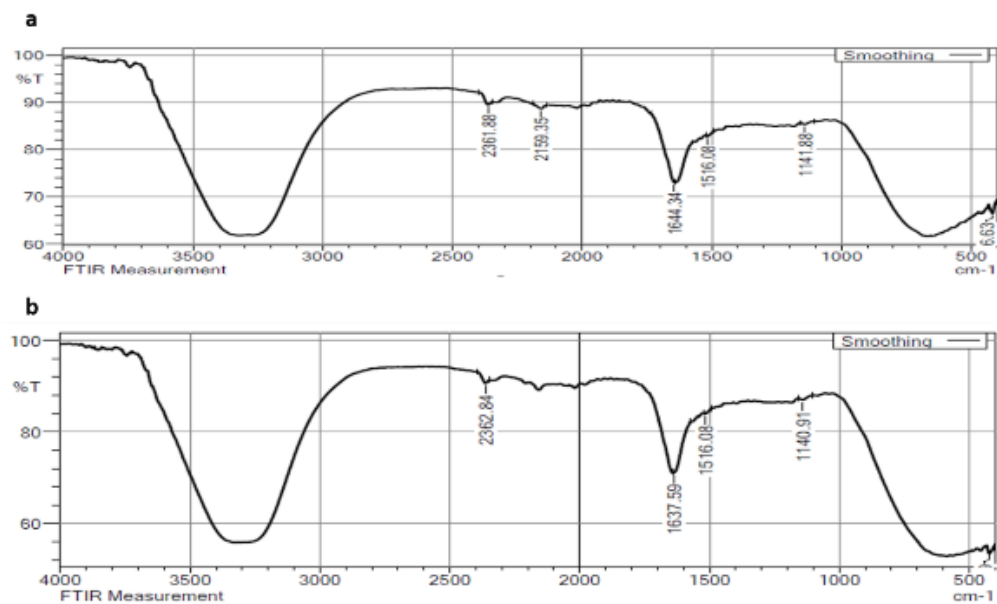

**Figure S9.** FTIR analysis purified gum polysaccharide a) MO gum, b) AI gum.
